# Supplementary material
Source: Springer Nature journal article supplement (https://www.springermedizin.de/resource/supplementary/12889_2012_4088_MOESM3_ESM.pdf/9491568)
Supplement: MOESM3 [file 9491568]

## **Group meetings**

### **First year topics**

Welcome – introduction  
Goal-setting  
Physical activity in RA  
Changing behavior  
To overcome barriers  
Pain/strength exercise  
Fatigue (circuit exercise)  
Sleep and stress  
HEPA and new life style  
Try alternative, new activities  
Maintaining physically active  
Relapse prevention  
Open content (2 occasions)  
Beliefs  
Risk situations (2 occasions)  
Social support – invite family  
and friends

## **Optional group meetings**

### **Second year topics**

Maintaining HEPA  
Motivation and circuit exercise  
Support  
Self efficacy  
Supporters  
Developing good habits  
Maintaining good habits

## **Educational material**

Changing behavior  
HEPA  
HEPA in RA  
Everyday exercise  
Aerobic exercise  
Strength exercise  
Cool down  
Stretching  
Measures

### **My test results**

Aerobic capacity  
Muscle function  
Fox test  
BMI  
Waist circumference
